# Supplementary material for: Molecular Characterization, Expression Pattern, and Ligand-Binding Property of Three Odorant Binding Protein Genes from Dendrolimus tabulaeformis
Source: PubMed Central journal article supplement (PMC4008786; doi:10.1007/s10886-014-0412-6), 2014-04-12
Supplement: 10886_2014_412_MOESM3_ESM.pdf [file 10886_2014_412_MOESM3_ESM.pdf]

31 ATGTTGGTGTATCTGGTACCTTTGGTGATTGGGCTGGTGATGGAA  
 M L V Y L V P L V I G L V M E

76 CCGGTTGTTGGGACTGCAGAGGTGATGAGCCACGTGACAGCCCAC  
 P V V G T A E V M S H V T A H

121 TTCGGGAAGGCTTTGCAGGAATGTCGTGATGAGTCAGGCCTGTCC  
 F G K A L Q E C R D E ~~X~~ G L S

166 CCGGAGATCCTAGAGGAGTTCAGCACTTCTGGAGCGAGGACTTC  
 P E I L E E F Q H F W S E D F

211 GAGGTGGTGCACCGGGAGCTGGGCTGCGCCATCATCTGCATGTGC  
 E V V H R E L G C A I I C M S

256 AACAAGTTCCTCCTCCAGGAGGATACCCGGATGCATCATGTCT  
 N K F S L L Q E D T R M H H V

301 AACATGCACGACTATGTCAAGAGTTTCCCTAACGGCCAGGTCTTA  
 N M H D Y V K S F P N G ~~X~~ Q V L

346 TCAGAGAAGCTGGTGCAGCTGATTCACAATTGCGAGAAGCAGTAC  
 S E K L V Q L I H N C E K Q Y

391 GACTCTATAACAGACGACTGTGAGCGTGTGGTGAAGGTCGCCGCG  
 D S I T D D C E R V V K V A A

436 TGCTTCAAGGTGGACGCCAAGAAAAGAGGGAATCGCCCCAGAAGTG  
C F K V D A K K E G I A P E V

481 GCCATGATCGAGGCCGTATGGAGAAATACTGA 513  
 A M I E A V M E K Y \*

TCTACAA AATCTTCAAC AAAATCCACA

ATTCACTTAT ATTAAAATGT ATGGAATAAA TAAAGTTTAA CCTAAAAAAA AAAAAAAAAA  
 AAAAAAAAAA AA

## Intron 1

|            |             |             |             |            |            |
|------------|-------------|-------------|-------------|------------|------------|
| gtaaggcatt | ttcaaaactcc | tcaaataaccg | gaaagggttgg | gagtaagata | atcctcatca |
| tcttaccatg | aaattgtggg  | tgcgttcggt  | tcacgaaata  | taaagagttt | cttagatgca |
| aatttcgctg | gtttactgca  | agaattcatt  | taactgatat  | acatagata  | atatggcagt |
| taatgagctt | ttgcagtaaa  | cggacgtttt  | ggtcaaaaaa  | ctacctaata | ggtacttgtt |
| tttcggtca  | gaatttgaac  | cggtcatect  | taactaagct  | accatggttc | aattatgtca |
| tcgtcatcat | catccgagca  | tttaateccg  | gttgcgttct  | gttatagata | tattctatgc |
| atccatttca | caccagtttt  | cattcagctt  | ccaatctaga  | cggtcatect | ttacaattga |
| tcattttatt | ccaattattc  | ttttttgaaa  | acgggttaac  | ctggttcctc | gtagcaattc |
| ggagcgttca | ctttaatgcc  | caaggctccg  | tgacatcttc  | tctaataatt | tatttttcgc |
| ggtttcatca | tacgttacat  | atttctacta  | actatacagt  | agttcctgag | aagcataaca |
| gttacttaca | aggatccgat  | ggacgaacgg  | accctacat   | gatgatttcg | ttacaagtac |
| cattttaage | aagcctctaa  | gtattaatc   | aaatcttcgc  | agctattgat | ataagtatat |
| tataaactcc | ag          |             |             |            |            |

## Intron 2

|            |             |             |            |             |              |
|------------|-------------|-------------|------------|-------------|--------------|
| gtgggtttat | ggatagggta  | aattatagta  | actagtggtc | gttctgtggtc | gaaattcgac   |
| cataataatt | tgctgtcgaa  | gactatactt  | ctataatcac | agattttctcc | aaggctacta   |
| tacactttta | atttgacttg  | aacaataaac  | aaaagagtat | atatgctgtg  | atgctgcaaa   |
| aacatggtag | tgtgtgtaat  | atTTTTTTT   | tgatttaata | taatttgtat  | gcataattta   |
| aaaaatatta | gcagctgtcc  | atTTTTTctat | atgcaataaa | tgtaaatta   | cactTTTTTtac |
| aactatTTTc | aaaacactgt  | tcttataaaa  | gagcaagtgt | taaaatgcag  | acaaaatgtc   |
| atgagaatta | aaaaaaaaata | tttaaacagt  | atgggcctta | cttacatTTT  | TTTTtaattt   |
| aaagaatatg | ctcggcaact  | gattagtga   | aatcctacc  | ataaactcct  | cttttagtaga  |
| atattttggg | tacaacctac  | gttaatcatt  | gaaatttcgt | tatatctgtgc | tcctcttagg   |
| taacaacacg | gttggttaca  | tggtgtataag | tgaaataaaa | agatattaat  | tgattagggt   |
| ccgattctga | ttctcttact  | taagtaatag  | tatcttaacg | agattattat  | aagtaaggtc   |
| atatgtgctt | acgctatTTc  | actccttaag  | tatgtgacgt | ctccttgctg  | tacgttaact   |
| tgctacgccc | ctattaaatc  | taggcggctt  | caacgtattg | aaagatgata  | taaactacct   |
| cagttgattc | gactatctac  | cctgttcatg  | ttggattcca | g           |              |
